# Supplementary material for: Density functional theory study of high-energy metal (Al, Mg, Ti, and Zr)/CuO composites
Source: Royal Society of Chemistry journal article supplement (doi:10.1039/c6ra18326c), 2016-01-01
Supplement: c6ra18326c1.pdf [file c6ra18326c1.pdf]

1 **Supplementary Information for “Density functional theory study of high-energy metal**  
2 **(Al, Mg, Ti, and Zr)/CuO composites”**

3 **Guolin Xiong, Chunhong Yang, Weihua Zhu,\* Heming Xiao**

4 **Contents**

5 **Table S1** Relaxed lattice constants of bulk CuO together with experimental and other  
6 calculated data.

7 **Table S2** Adsorption energies of different number of close-packed Al layers with the closest  
8 layer located in the O<sub>surf</sub> atom as shown in Figure 1(b).

9 **Figure S1** Calculated TDOS (a) and atom-projected PDOS (b) and (c) profiles for  
10 Al/CuO(111), Mg/CuO(111), Ti/CuO(111), and Zr/CuO(111). DOS for the atoms around the  
11 centers of metal layers (denoted as “bulk”) and for interfacial metal and O in the on-top  
12 configuration are displayed. The Fermi level of each supercell is set at 0 eV.

13

14

15

16

17

18

19

20

21

22 **Table S1** Relaxed lattice constants of bulk CuO together with experimental and other  
 23 calculated data.

|                      | a (Å)        | b (Å)        | c (Å)            | $\beta$ (°)  |
|----------------------|--------------|--------------|------------------|--------------|
| Expt. <sup>31</sup>  | 4.684        | 3.423        | 5.129            | 99.54        |
| Expt. <sup>32</sup>  | 4.685        | 3.428        | 5.123            | 99.54        |
| GGA+U <sup>18</sup>  | 4.76(1.6%)   | 3.48(1.7%)   | 5.21(1.6%)       | 99.50(-0.1%) |
| LSDA+U <sup>33</sup> | 4.55(-2.9%)  | 3.34(-2.4%)  | 4.99(-2.7%)      | 99.51(-0.1%) |
| This work (PBE+U)    | 4.678(-0.1%) | 3.366(-1.7%) | 5.112(-<br>0.3%) | 99.80(0.3%)  |

24

25 **Table S2** Adsorption energies of different number of close-packed Al layers with the closest  
 26 layer located in the O<sub>surf</sub> atom as shown in Figure 1(b).

| Number of Al layers (4 Al per layer) | $E_{\text{ads}}$ (eV) |
|--------------------------------------|-----------------------|
| One                                  | -2.99                 |
| Two                                  | -1.60                 |
| Three                                | -1.42                 |
| Four                                 | -1.33                 |
| Five                                 | -1.21                 |
| Six                                  | -1.10                 |

27

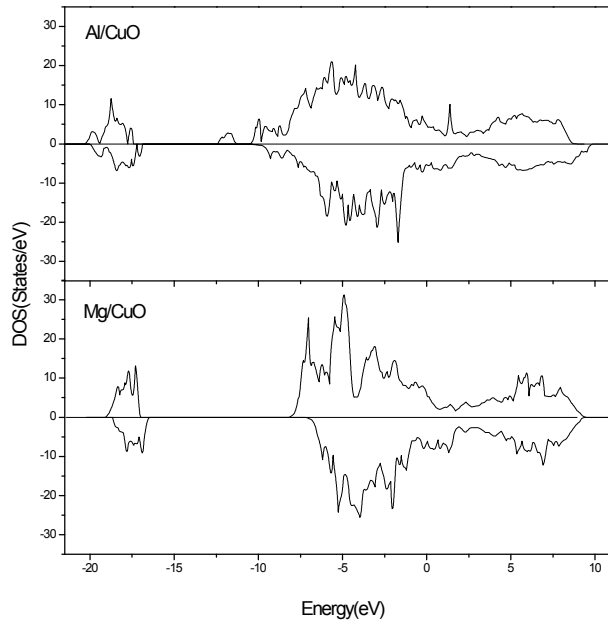

28

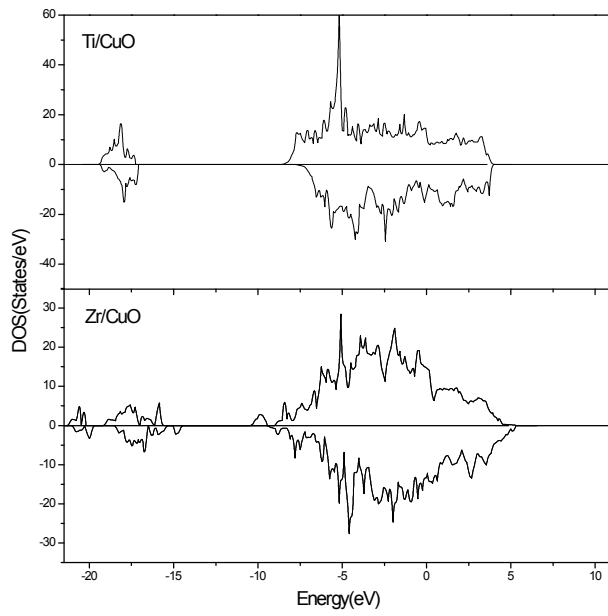

29

30

(a)

31

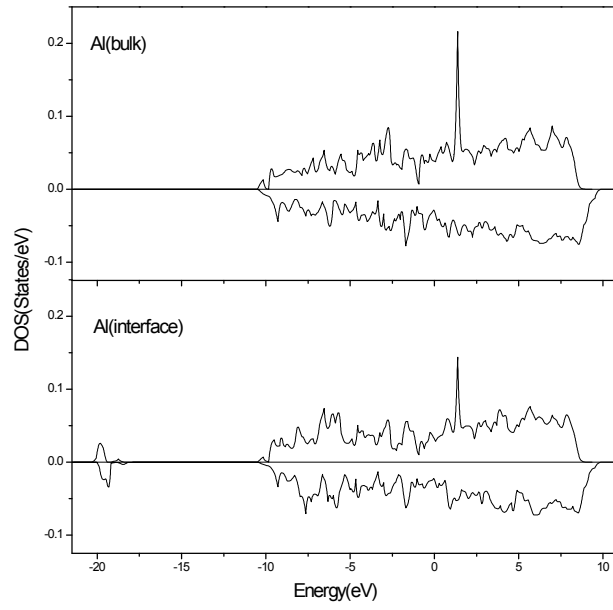

32

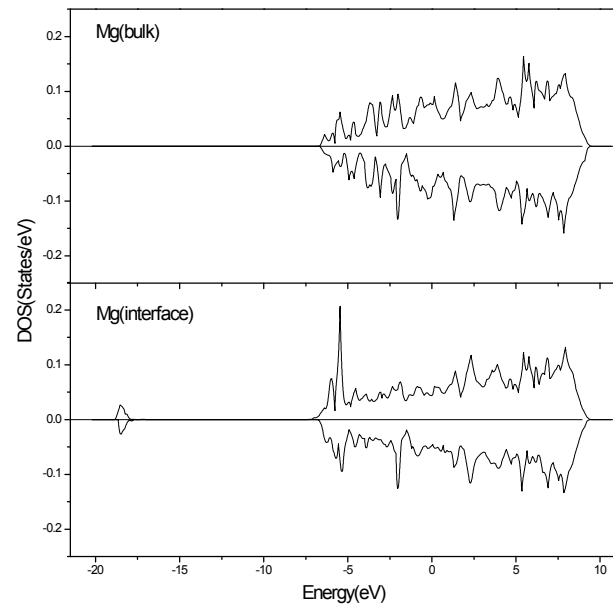

33

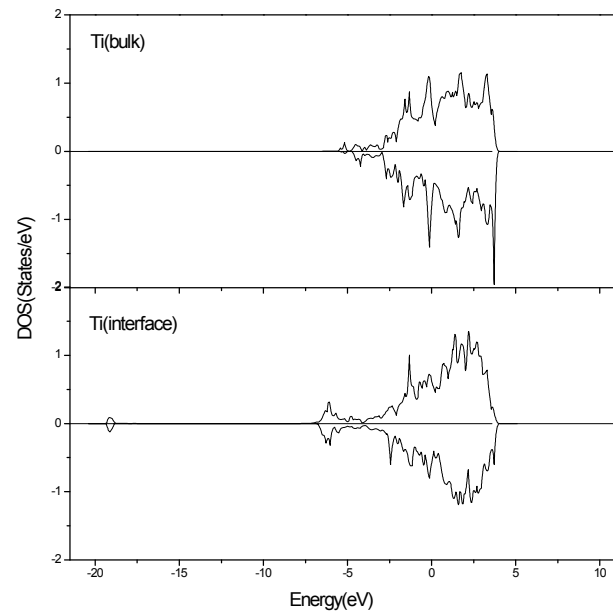

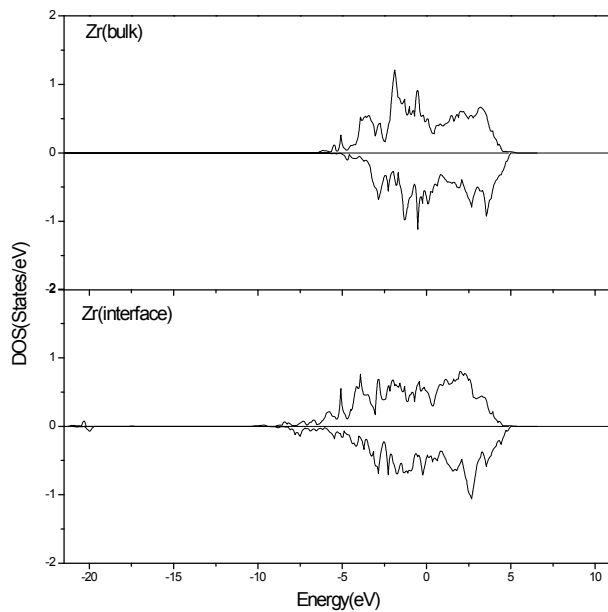

34

35

(b)

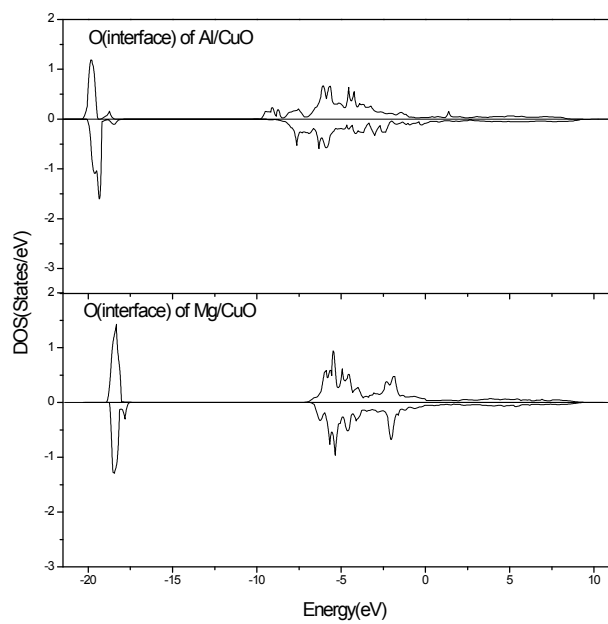

36

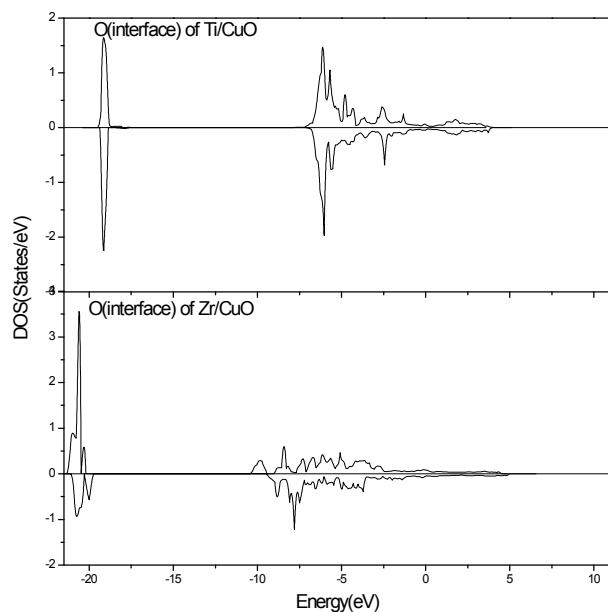

37

38

(c)

39 **Fig. S1** Calculated TDOS (a) and atom-projected PDOS (b) and (c) profiles for Al/CuO(111),  
 40 Mg/CuO(111), Ti/CuO(111), and Zr/CuO(111). DOS for the atoms around the centers of  
 41 metal layers (denoted as “bulk”) and for interfacial metal and O in the on-top configuration  
 42 are displayed. The Fermi level of each supercell is set at 0 eV.

43

44

45
